# Supplementary material
Source: publisher figshare collection journal article supplement (https://tandf.figshare.com/articles/dataset/_/8977076)
Supplement: Supplementary file 3 [file 1]

Archive with 2 entries (2 files):
- iidt_a_1642392_sm3280.pdf
- iidt_a_1642392_sm3279.pdf
